# Supplementary figures and images for: Evaluation of UV Aerosol Retrievals from an Ozone Lidar
Source: Copernicus journal article supplement (doi:10.5194/amt-2020-40), 2020-03-26

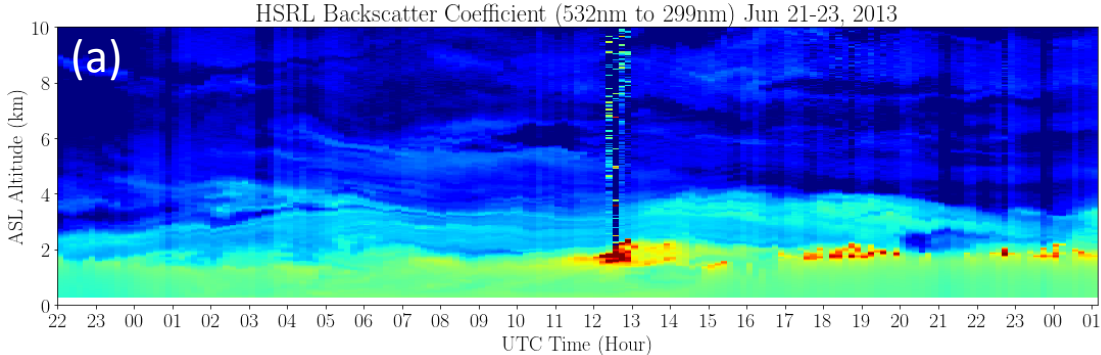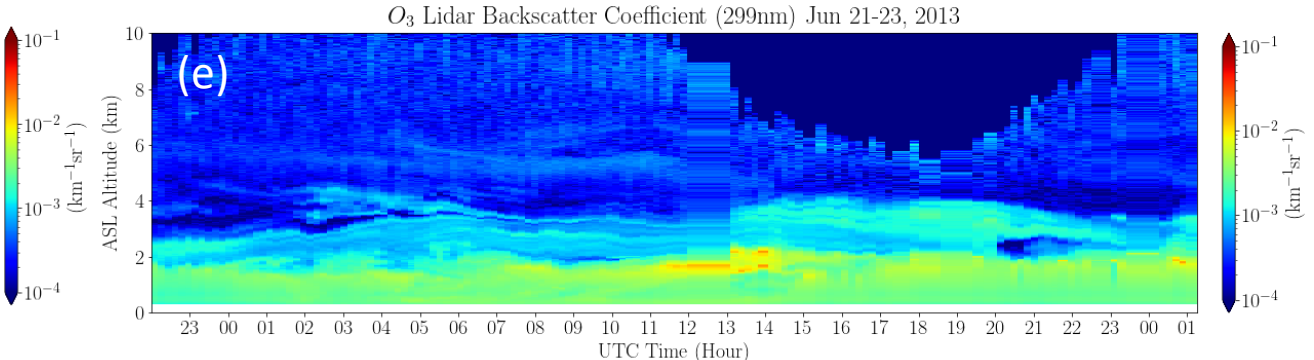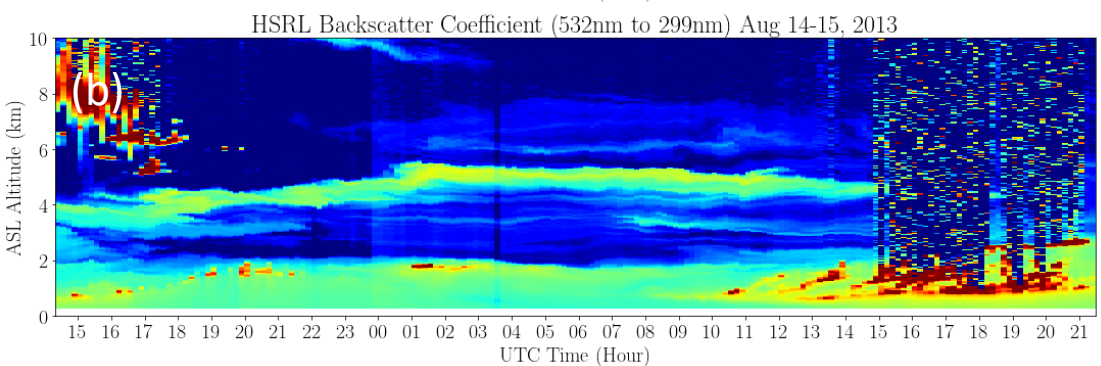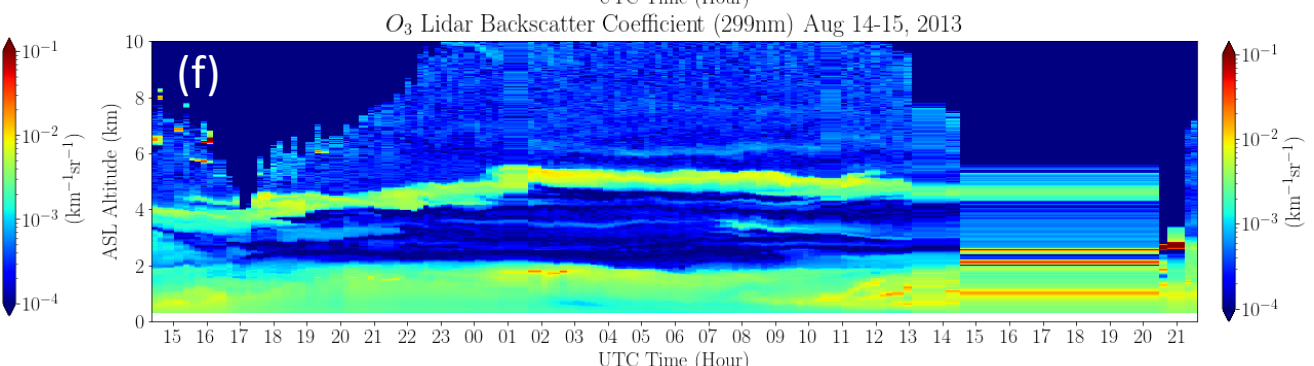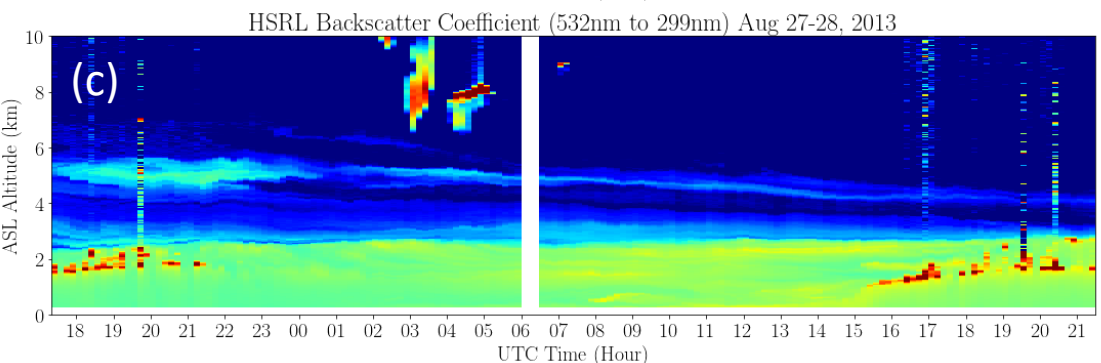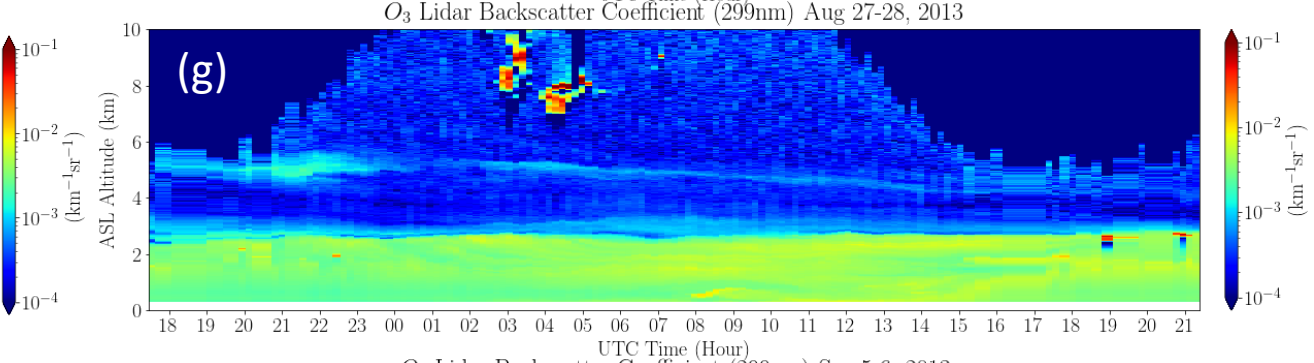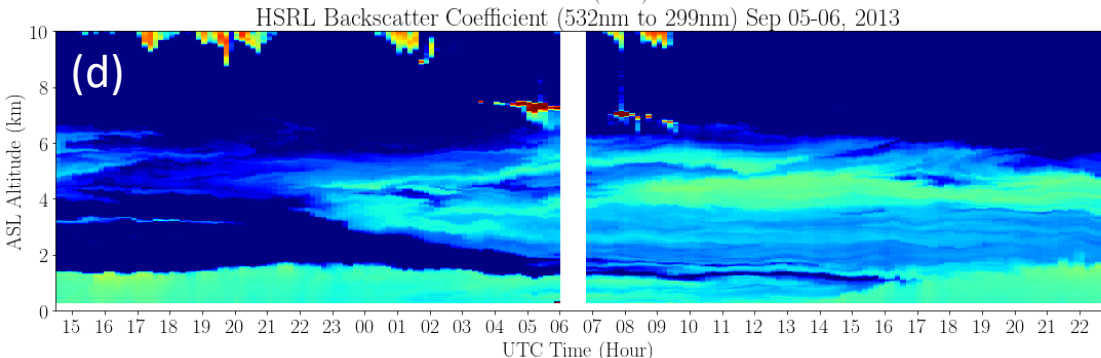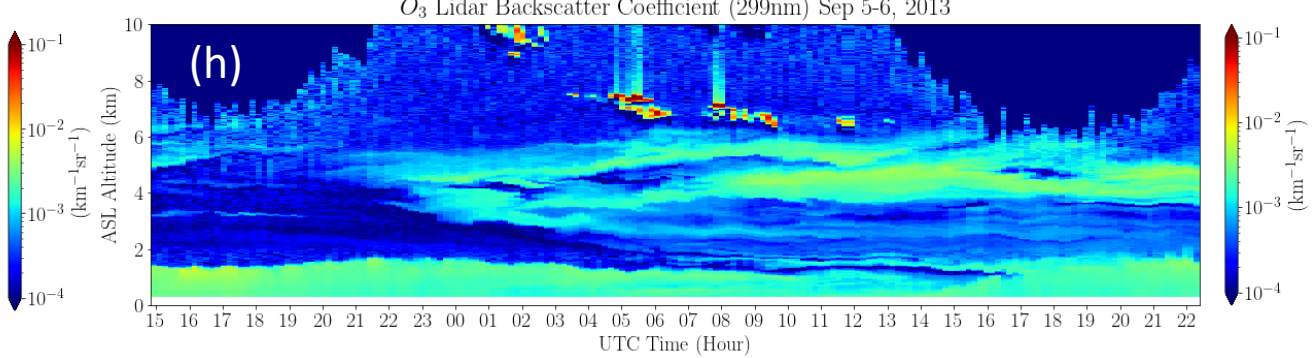

Supplement: Supplementary file 1 [file amt-2020-40-supplement.pdf]
